# Supplementary material
Source: MDPI journal article supplement (https://www.mdpi.com/1999-4907/9/8/476)
Supplement: s1 [file s1]

## Household survey, NEPAL

Interviewer: \_\_\_\_\_ Date: \_\_\_\_\_

Household no. \_\_\_\_\_ Caste \_\_\_\_\_

VDC \_\_\_\_\_ Settlement/ward \_\_\_\_\_ Aspect \_\_\_\_\_ Masl \_\_\_\_\_

### 1) Family map

### 2) Land

How much khet **owned**? \_\_\_\_\_ ropani

How much khet **cultivated** \_\_\_\_\_ ropani

How much bari **owned**? \_\_\_\_\_ ropani

Own abandoned land (that was cultivated before)? \_\_\_\_\_ ropani

Do you have property documents (lal purja) on your land?

Yes ☐ No ☐

Use of chemical fertilizer on any crops? \_\_\_\_\_ (kg/ropani)

Have you planted some new crops or vegetables during the last 10 years?

No ☐ Yes ☐

If yes, which crops/vegetables? \_\_\_\_\_

### 3) What is needed in order to produce more crops on the land you cultivate today (rank 1-6)?

|                          |  |
|--------------------------|--|
| More water               |  |
| More labour              |  |
| More manure              |  |
| More chemical fertilizer |  |
| Better seeds             |  |
| Better extension service |  |

### 4) Livestock (numbers)

Buffalo # \_\_\_\_\_ Cow # \_\_\_\_\_ Ox # \_\_\_\_\_ Goat # \_\_\_\_\_ Sheep # \_\_\_\_\_ Pig # \_\_\_\_\_ Chicken # \_\_\_\_\_

How many buffaloes do you keep semi-permanently in the forest? \_\_\_\_\_

### 5) What are the most important difficulties in forest (tiger, snake, monkeys, insects, evil spirits/creatures, *bhoot pret*) \_\_\_\_\_

### 6) For what purpose is forest most important (rank 1-5)?

| Forest service      | Rank | Three most important species | Annual amount (est)* |
|---------------------|------|------------------------------|----------------------|
| Firewood            |      |                              |                      |
| Fodder              |      |                              |                      |
| Leaf litter/bedding |      |                              |                      |
| Edible plants       |      |                              |                      |
| Medicinal plants    |      |                              |                      |

Do you use alternative fuels (other than firewood): \_\_\_\_\_

**7) Most used tree species**

| Tree species | Private forest | Protected forest | Government forest |
|--------------|----------------|------------------|-------------------|
|              |                |                  |                   |
|              |                |                  |                   |
|              |                |                  |                   |
|              |                |                  |                   |

**8) Forest quality compared to 10 years ago**

| Is forest quality... | better | same | worse |
|----------------------|--------|------|-------|
| Protected forest     |        |      |       |
| Govnt forest         |        |      |       |

**9) Is the forest getting degraded?**No ☐ or Yes ☐

What are the primary causes for the forest destruction/degradation? (rate 1 to 4, where 1 is the most important)

(....) clearing for cultivation

(....) excessive firewood/timber coll.

(....) excessive fodder coll.

(....) year grazing

**10) Community forest rules**

Are you content with Community Forest/Protected Forest rules?

Yes ☐ No ☐

If not, why? \_\_\_\_\_

Which species are prohibited to collect? \_\_\_\_\_

**11) Government forest**

Do you have sufficient access to Government Forest?

Yes ☐ No ☐

Explain why \_\_\_\_\_

**Wealth ranking of household (interviewer's evaluation)**Wealthy ☐Middle ☐Poor ☐
